# Supplementary material
Source: Springer Nature journal article supplement (https://www.springermedizin.de/resource/supplementary/12884_2014_1074_MOESM1_ESM.pdf/9458874)

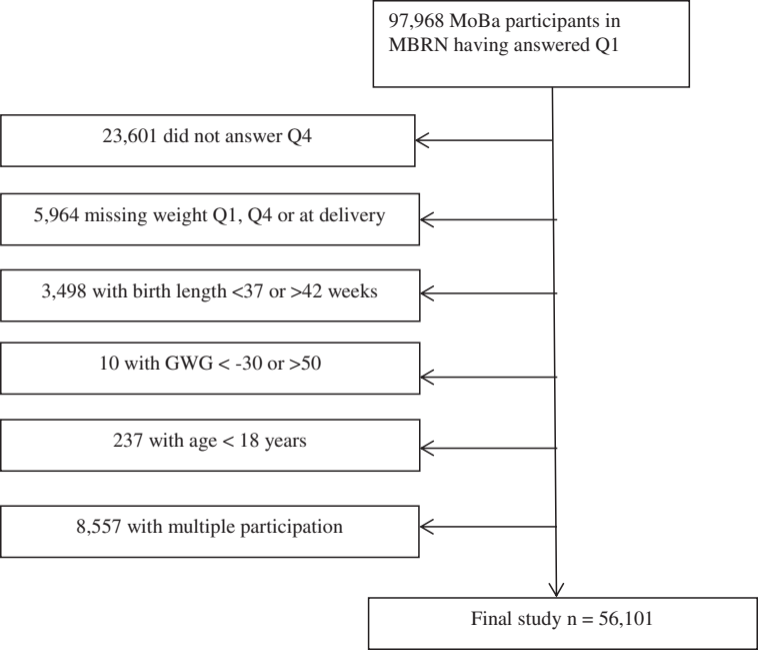

Supplement: MOESM1 [file 9458874]
